# Supplementary material for: The Loss-Function of KNL1 Causes Oligospermia and Asthenospermia in Mice by Affecting the Assembly and Separation of the Spindle through Flow Cytometry and Immunofluorescence
Source: MDPI journal article supplement (doi:10.3390/s23052571), 2023-02-25
Supplement: s1 [file s1]

Supplementary Information for

**The loss-function of *KNL1* causes oligospermia and asthenospermia in mice by affecting the assembly and separation of the spindle through flow cytometry and immunofluorescence**

This PDF file includes Supplementary  
Figure S1–S3 and Table S1

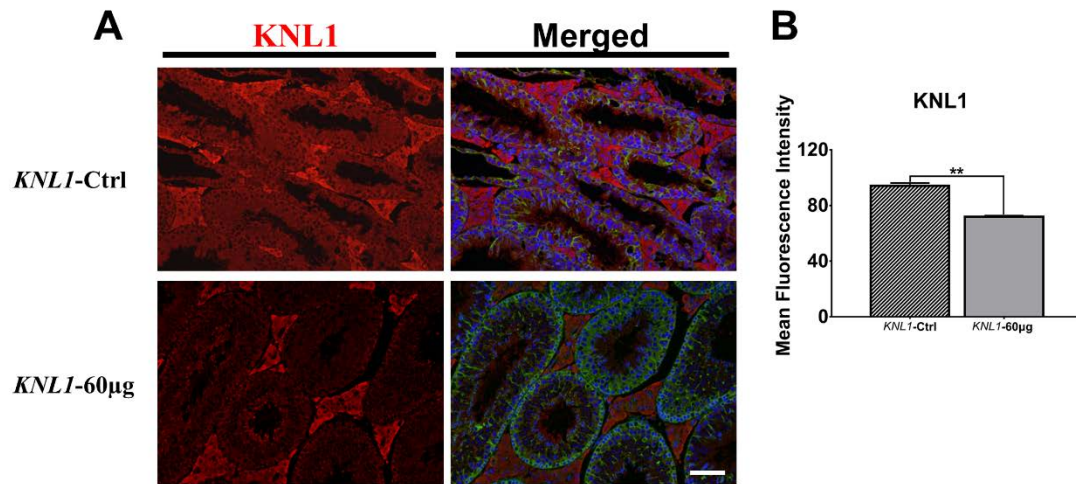

**Figure S1.** Immunofluorescence intensity of *KNL1* between *KNL1*-Ctrl and *KNL1*-60 μg. **(A)** *KNL1* fluorescent images of testis in *KNL1*-Ctrl and *KNL1*-60μg. Testis was immunostained with anti-*KNL1* (red). Merge was DAPI (blue), *KNL1* (red), and α-tubulin (green). **(B)** Data were presented as mean percentages (mean ± SEM) of at least three independent measurements. Asterisk denotes statistical difference level of significance (\*\*,  $p < 0.01$ , ns > 0.05). Bar= 100 μm.

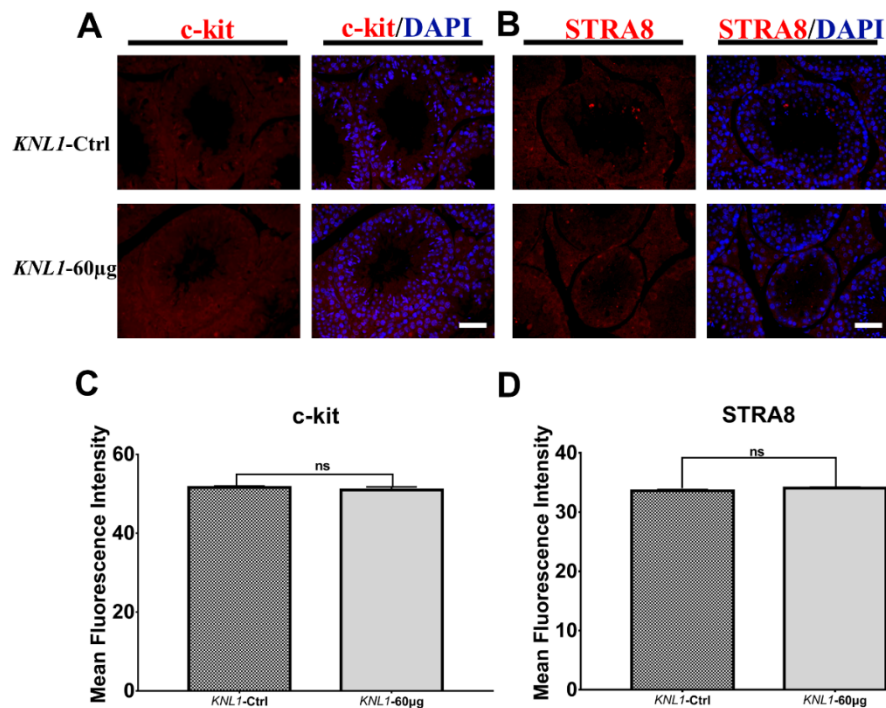

**Figure S2.** Immunofluorescence intensity of two markers between *KNL1*-Ctrl and *KNL1*-60 μg. **(A)** c-kit fluorescent images of testis in *KNL1*-Ctrl and *KNL1*-60 μg. Testis was immunostained with anti-c-kit (red). Merge was DAPI (blue) and c-kit (red). **(B)** STRA8 fluorescent images of testis in *KNL1*-Ctrl and *KNL1*-60 μg. Testis was immunostained with anti-STRA8 (red). Merge was DAPI (blue) and STRA8 (red). **(C,D)** Data were presented as mean percentages (mean ± SEM) of at least three independent measurements. ns denotes statistical difference at a  $p > 0.05$  level of significance. Bar = 50 μm.

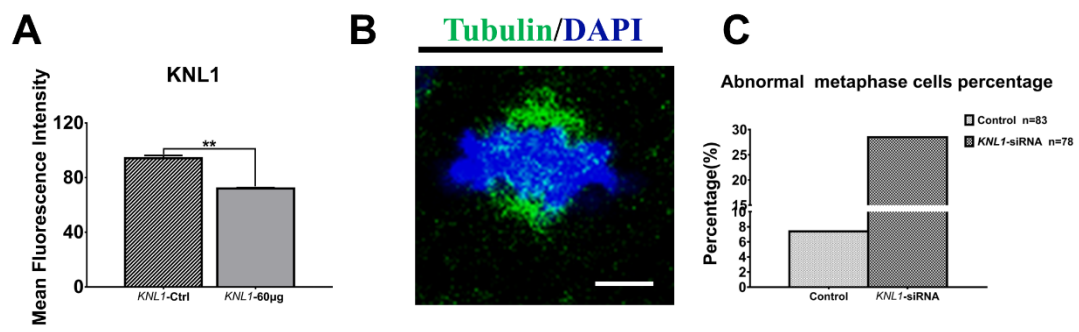

**Figure S3.** *KNL1* siRNA interference efficiency and immunofluorescence image of normal cell division. (A) *KNL1* siRNA interference efficiency in GC-2 cells. (B) The normal spindle and chromosome arrangement at metaphase. Bar= 5 μm. (C) The percentage of abnormal metaphase cells between Control-cells and *KNL1*-siRNA-cells. Asterisk denotes statistical difference level of significance (\*\*,  $p < 0.01$ , ns > 0.05).

**Table S1.** Immunofluorescence antibody used in the experiment

| Name                                                          | Brand       |
|---------------------------------------------------------------|-------------|
| <i>PLZF</i> Rabbit Polyclonal Antibody                        | Beyotime    |
| Histone <i>H2AX</i> Rabbit Polyclonal Antibody                | Beyotime    |
| <i>STRA8</i> Monoclonal antibody                              | Proteintech |
| <i>SYCP3</i> Polyclonal antibody                              | Proteintech |
| <i>GFR<math>\alpha</math>1</i> Polyclonal Antibody            | Elabscience |
| Purified Anti-Mouse c-kit Antibody                            | Elabscience |
| Alpha Tubulin Polyclonal antibody                             | Proteintech |
| CASC5 (E4A5L) Rabbit mAb                                      | CST         |
| Goat Anti-Rabbit IgG H&L (Alexa Fluor 594)                    | GeneCopoeia |
| CoraLite594 – conjugated Goat Anti-Mouse IgG(H+L)             | Proteintech |
| CoraLite488 – conjugated Affinipure Goat Anti-Rabbit IgG(H+L) | Proteintech |
